# Supplementary material for: A Scale to Assess the Methodological Quality of Studies Assessing Usability of Electronic Health Products and Services: Delphi Study Followed by Validity and Reliability Testing
Source: PubMed Central journal article supplement (PMC6884719; doi:10.2196/14829), 2019-11-15
Supplement: jmir_v21i11e14829_app2.pdf [file jmir_v21i11e14829_app2.pdf]

Multimedia Appendix 2 – Methodological assessment of studies for the reliability and validity analysis of the scale (NA – not applicable; consensus score – final score after consensus; % – percentage out of maximum possible score).

| Studies | Scale items |   |   |   |   |   |   |   |   |   |   |   |   |   |   | Consensus score | % |   |   |   |   |   |   |   |   |   |   |   |   |    |   |   |    |    |    |    |   |   |    |   |   |    |    |    |    |    |      |   |   |      |
|---------|-------------|---|---|---|---|---|---|---|---|---|---|---|---|---|---|-----------------|---|---|---|---|---|---|---|---|---|---|---|---|---|----|---|---|----|----|----|----|---|---|----|---|---|----|----|----|----|----|------|---|---|------|
|         | 1           |   |   | 2 |   |   | 3 |   |   | 4 |   |   | 5 |   |   |                 |   | 6 |   |   | 7 |   |   | 8 |   |   | 9 |   |   | 10 |   |   | 11 |    |    | 12 |   |   | 13 |   |   | 14 |    |    | 15 |    |      |   |   |      |
|         | A           | B | C | A | B | C | A | B | C | A | B | C | A | B | C |                 |   | A | B | C | A | B | C | A | B | C | A | B | C | A  | B | C | A  | B  | C  | A  | B | C | A  | B | C | A  | B  | C  | A  | B  | C    |   |   |      |
| [20]    | 0           | 1 | 0 | 0 | 1 | 0 | 1 | 1 | 1 | 1 | 1 | 1 | 1 | 1 | 1 | 1               | 0 | 1 | 0 | 1 | 0 | 0 | 0 | 0 | 1 | 0 | 1 | 0 | 0 | 0  | 0 | 0 | 0  | 1  | 1  | 1  | 0 | 0 | 0  | 1 | 1 | 1  | 1  | 1  | 1  | 1  | 1    | 1 | 8 | 53.3 |
| [21]    | 0           | 0 | 0 | 0 | 0 | 0 | 1 | 1 | 1 | 1 | 1 | 1 | 1 | 1 | 1 | 0               | 1 | 0 | 0 | 0 | 0 | 0 | 0 | 0 | 0 | 1 | 1 | 0 | 0 | 0  | 0 | 0 | 0  | 1  | 1  | 1  | 1 | 0 | 1  | 1 | 0 | 1  | 1  | 1  | 1  | 9  | 60,0 |   |   |      |
| [22]    | 0           | 0 | 0 | 0 | 0 | 0 | 1 | 0 | 0 | 0 | 0 | 0 | 1 | 0 | 0 | 1               | 0 | 0 | 0 | 0 | 1 | 0 | 0 | 0 | 1 | 1 | 1 | 0 | 0 | 0  | 0 | 0 | 0  | 1  | 1  | 1  | 1 | 1 | 1  | 1 | 0 | 0  | 1  | 1  | 1  | 4  | 26.6 |   |   |      |
| [23]    | 0           | 0 | 0 | 0 | 0 | 0 | 1 | 1 | 1 | 1 | 1 | 1 | 1 | 1 | 1 | 1               | 1 | 1 | 0 | 1 | 0 | 0 | 0 | 0 | 0 | 0 | 1 | 0 | 0 | 0  | 0 | 0 | 0  | 1  | 1  | 1  | 0 | 0 | 0  | 1 | 1 | 0  | 1  | 1  | 1  | 7  | 46.7 |   |   |      |
| [24]    | 1           | 1 | 0 | 0 | 0 | 0 | 1 | 1 | 1 | 1 | 1 | 1 | 1 | 1 | 1 | 1               | 1 | 1 | 1 | 1 | 1 | 0 | 0 | 0 | 1 | 1 | 1 | 0 | 0 | 0  | 0 | 0 | 0  | NA | NA | NA | 1 | 1 | 1  | 1 | 1 | 1  | NA | NA | NA | 9  | 69.2 |   |   |      |
| [25]    | 0           | 0 | 0 | 0 | 0 | 0 | 1 | 1 | 1 | 1 | 1 | 1 | 1 | 1 | 1 | 1               | 1 | 1 | 1 | 1 | 1 | 0 | 0 | 0 | 1 | 1 | 1 | 0 | 0 | 0  | 0 | 0 | 0  | 1  | 1  | 1  | 1 | 1 | 1  | 1 | 1 | 1  | 1  | 1  | 1  | 10 | 66.7 |   |   |      |
| [26]    | 0           | 0 | 0 | 0 | 0 | 0 | 1 | 1 | 1 | 1 | 1 | 1 | 1 | 0 | 1 | 1               | 1 | 1 | 0 | 1 | 0 | 0 | 0 | 0 | 1 | 1 | 1 | 0 | 0 | 0  | 0 | 0 | 0  | 1  | 1  | 1  | 1 | 1 | 1  | 1 | 1 | 1  | 1  | 1  | 1  | 9  | 60.0 |   |   |      |
| [27]    | 1           | 1 | 1 | 1 | 1 | 1 | 1 | 1 | 1 | 1 | 1 | 1 | 1 | 1 | 1 | 1               | 1 | 1 | 1 | 1 | 1 | 0 | 0 | 0 | 0 | 0 | 0 | 0 | 0 | 0  | 0 | 0 | 0  | 1  | 1  | 1  | 0 | 1 | 0  | 1 | 1 | 1  | 1  | 1  | 1  | 10 | 66.7 |   |   |      |
| [28]    | 0           | 0 | 0 | 0 | 0 | 0 | 0 | 1 | 0 | 0 | 1 | 0 | 1 | 1 | 1 | 0               | 1 | 0 | 0 | 0 | 0 | 1 | 1 | 1 | 0 | 1 | 1 | 0 | 0 | 0  | 0 | 0 | 0  | 1  | 1  | 1  | 0 | 0 | 1  | 1 | 1 | 1  | 1  | 1  | 1  | 6  | 40.0 |   |   |      |
| [29]    | 0           | 0 | 0 | 0 | 0 | 0 | 1 | 0 | 1 | 0 | 0 | 0 | 1 | 1 | 1 | 0               | 0 | 0 | 1 | 1 | 1 | 0 | 0 | 0 | 1 | 1 | 1 | 0 | 0 | 0  | 0 | 0 | 0  | 1  | 1  | 1  | 1 | 0 | 1  | 1 | 1 | 1  | 1  | 1  | 1  | 8  | 53.3 |   |   |      |
| [30]    | 0           | 0 | 0 | 0 | 0 | 0 | 1 | 1 | 1 | 1 | 1 | 0 | 1 | 1 | 1 | 1               | 1 | 0 | 1 | 1 | 1 | 0 | 0 | 0 | 0 | 1 | 1 | 0 | 0 | 0  | 0 | 0 | 0  | 1  | 1  | 1  | 0 | 0 | 0  | 1 | 1 | 1  | 1  | 1  | 1  | 9  | 60.0 |   |   |      |
| [31]    | 0           | 0 | 0 | 0 | 0 | 0 | 1 | 1 | 1 | 1 | 1 | 1 | 0 | 1 | 0 | 1               | 1 | 1 | 1 | 1 | 0 | 0 | 0 | 0 | 1 | 1 | 1 | 0 | 0 | 1  | 0 | 0 | 0  | 1  | 1  | 1  | 1 | 1 | 0  | 1 | 1 | 1  | 1  | 1  | 1  | 9  | 60.0 |   |   |      |
| [32]    | 1           | 1 | 1 | 1 | 1 | 1 | 1 | 1 | 1 | 1 | 1 | 1 | 1 | 1 | 0 | 0               | 1 | 1 | 0 | 0 | 0 | 1 | 1 | 1 | 0 | 0 | 0 | 0 | 0 | 0  | 1 | 1 | 1  | 1  | 1  | 1  | 1 | 1 | 1  | 1 | 1 | 1  | 1  | 1  | 1  | 12 | 80.0 |   |   |      |
| [33]    | 0           | 0 | 0 | 0 | 0 | 0 | 1 | 1 | 1 | 1 | 1 | 1 | 1 | 1 | 1 | 1               | 1 | 1 | 0 | 1 | 1 | 0 | 0 | 0 | 1 | 1 | 1 | 0 | 0 | 0  | 0 | 0 | 0  | 1  | 1  | 1  | 1 | 1 | 1  | 1 | 1 | 1  | 1  | 1  | 1  | 10 | 66.7 |   |   |      |
| [34]    | 0           | 0 | 0 | 1 | 0 | 0 | 1 | 1 | 1 | 1 | 1 | 1 | 1 | 1 | 1 | 0               | 0 | 0 | 1 | 1 | 1 | 0 | 0 | 0 | 0 | 0 | 1 | 0 | 0 | 0  | 0 | 0 | 0  | 1  | 0  | 1  | 1 | 0 | 1  | 1 | 1 | 1  | 1  | 1  | 1  | 8  | 53.3 |   |   |      |
| [35]    | 0           | 0 | 0 | 0 | 0 | 0 | 1 | 1 | 1 | 1 | 1 | 1 | 1 | 1 | 1 | 1               | 1 | 1 | 1 | 1 | 0 | 0 | 0 | 0 | 1 | 0 | 1 | 0 | 0 | 0  | 0 | 0 | 0  | 1  | 1  | 1  | 1 | 0 | 1  | 1 | 1 | 1  | 1  | 1  | 1  | 10 | 66.7 |   |   |      |
